# Supplementary material
Source: Research Square preprint supplement (doi:10.21203/rs.3.rs-10278726/v1)

# Graphical Abstract


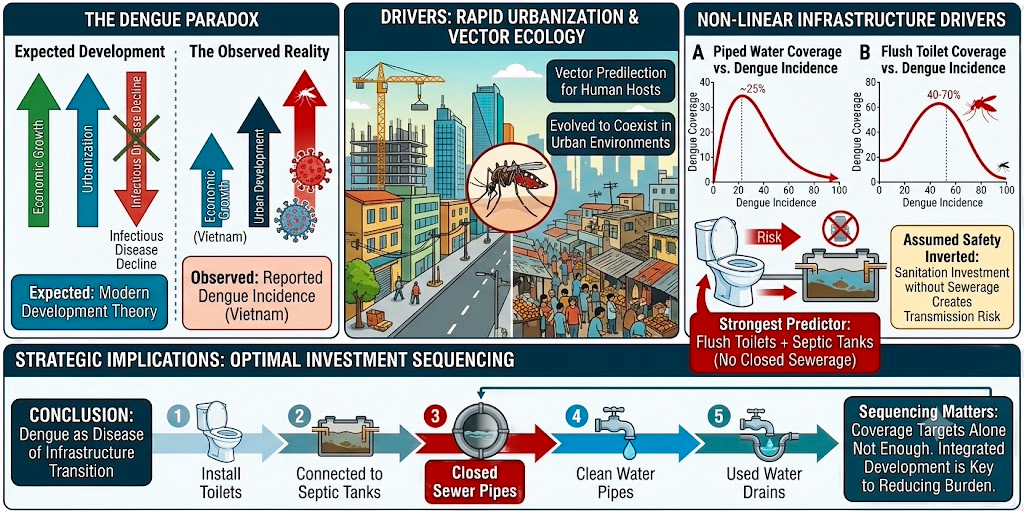

Supplement: Supplementary file 1 [file 8da90e182bd2e53c424dbb50.docx]
